# Supplementary material
Source: PubMed Central journal article supplement (PMC3806536)

## SUPPLEMENTARY DATA

TABLE S1. Primer pairs and PCR conditions used in this study.

| Target transcripts                     | Primer pair      | Primer Sequences<br>5' → 3'                        | Annealing temperature<br>(°C) | RT-PCR product size<br>(bp) |
|----------------------------------------|------------------|----------------------------------------------------|-------------------------------|-----------------------------|
| <i>S-RNases</i><br>(C2-C5<br>fragment) | C2f<br>C5r       | AACTTTACRATYCAYGRCTTTG<br>RAACATATRCCWAYCTC        | 47,4                          | ~420                        |
| <i>S-RNases</i><br>(C2-C4<br>fragment) | C2f<br>C4r       | see above<br>CARAAGATCAAACCTTRTCT                  | 47,4                          | ~280                        |
| NnSR1                                  | NnRS1f<br>NnRS1r | GACTGTGGAGACATTTACGA<br>TAGGATACGCTTGAGTAACTGCT    | 63                            | 313                         |
| NnSR2                                  | NnRS2f<br>NnRS2r | TAACTGCGAGTCAAATAAG<br>AATGCAGTTGAGGTTAGGA         | 53,9                          | 332                         |
| NE                                     | NEf<br>NEr       | ATCCATGGACTTTGGCCTAA<br>ACAAGTGCCATGTTTTCCCATTCATG | 58                            | 203                         |
| Actin                                  | Actinf<br>Actinr | TGGAGAAGATATGGCATCATAAC<br>CTGGAAGGTGCTGAGGGAAG    | 55,7                          | 840                         |

FIG. S1. Specificity of pNnSR1 recognition by antisera. The antisera against BSA-pNnSR1 and KLH-pNnSR1 conjugates were assayed in their ability to recognize pNnSR1. (A) Anti BSA-pNnSR1 serum was assayed by immunodot. One  $\mu\text{g}$  of KLH, BSA, KLH-pNnSR1 and BSA-pNnSR1 was dotted onto nitrocellulose membrane and probed with anti B-pNnSR1 serum diluted 1:5,000. Preimmune control is shown. (B) Anti KLH-pNnSR1 serum was assayed by immunoblot. Two  $\mu\text{g}$  of each BSA and BSA-pNnSR1 were run by SDS-PAGE, blotted onto nitrocellulose filter and probed with anti KLH-pNnSR1 serum diluted 1:5000.

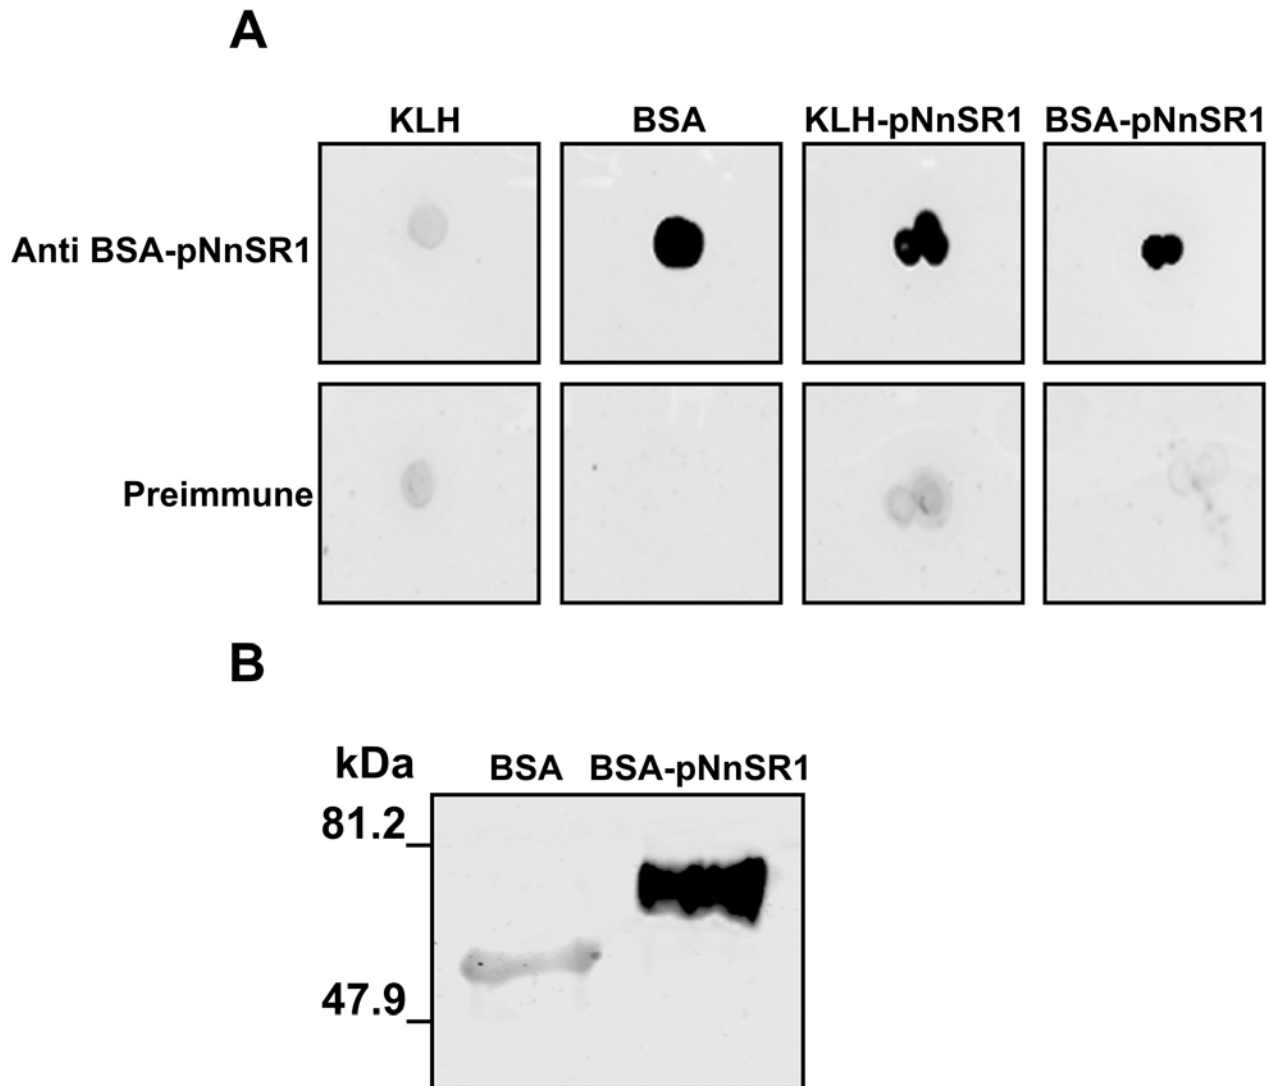

FIG. S2. Expression of class III *NnSR1* transcript induced by Pi-deprivation in *Nicotiana alata* roots. RT-PCR amplification from roots exposed to 14 days of Pi-starvation. Degenerate primers designed from C2 and C4 conserved domains of *Nicotiana alata* *S-RNases* were used. A representative gel and the statistical analysis are shown. Signal intensity values represent the mean  $\pm$  SEM of three independent experiments. Data were analyzed using the *t*-test. \*\*\*, high significant differences ( $P < 0.001$ ). Pi<sup>-</sup>, Pi deficient medium; Pi<sup>+</sup>, Pi sufficient medium.

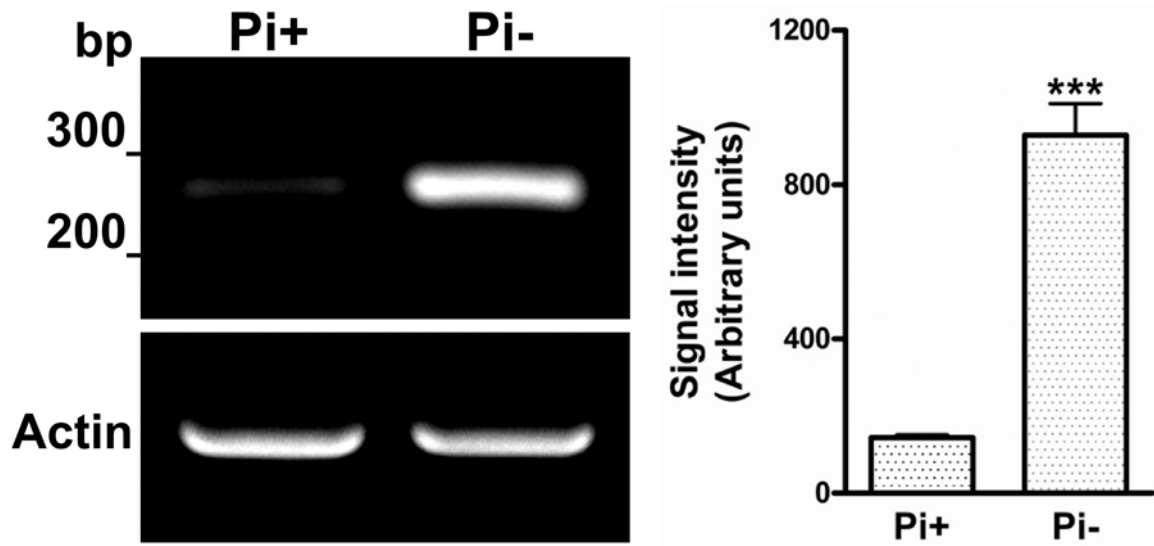

FIG. S3. Expression of class III *non-S-RNase* transcripts induced by Pi-deprivation in *Nicotiana alata* roots. RT-PCR amplification from roots exposed to 14 days of Pi-starvation is shown. Specific primers for *NnSR1* and *NnSR2* amplification were used. Pi<sup>-</sup>, Pi deficient medium; Pi<sup>+</sup>, Pi sufficient medium.

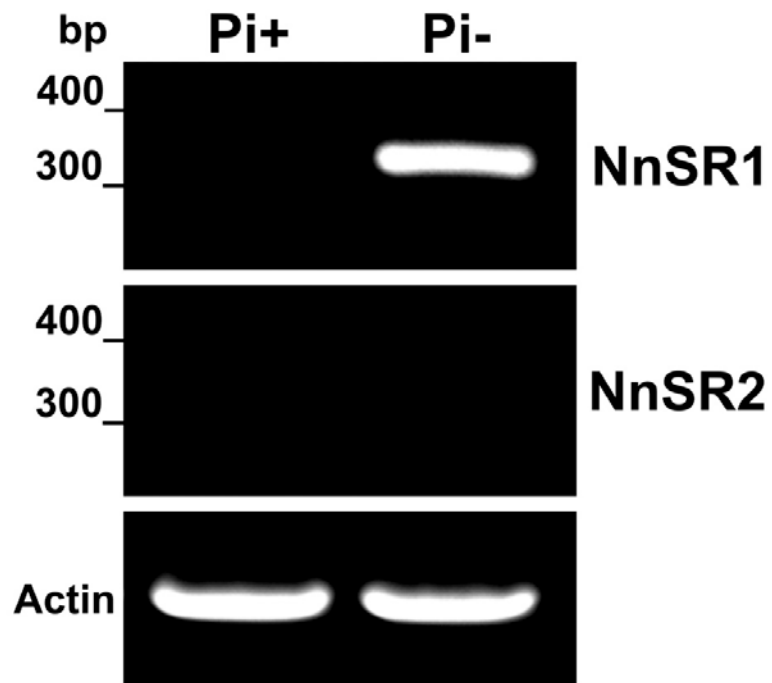



FIG. S5. Expression of NnSR1 in roots, sepals and petals of *Nicotiana alata* exposed to 14 days of Pi-limitation. The anti BSA-pNnSR1 serum was used as probe. Thirty  $\mu\text{g}$  of protein were loaded in each lane. The result is representative of three independent experiments. Pi<sup>-</sup>, Pi deficient medium; Pi<sup>+</sup>, Pi sufficient medium.

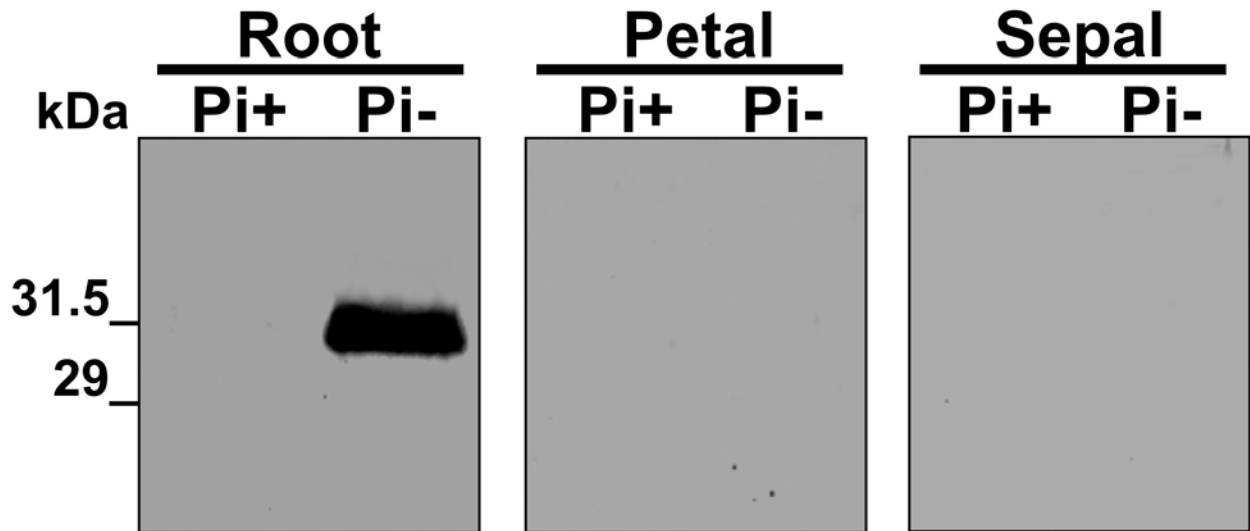

Supplement: supp_mct207_mct207supp.pdf [file supp_mct207_mct207supp.pdf]
